# Supplementary material
Source: PubMed Central journal article supplement (PMC2174892)
Supplement: plntcell_tpc.107.053322_1.pdf [file plntcell_tpc.107.053322_1.pdf]

ppcA-ft AA-----  
 ppcA-fb -----  
 ppcA-fbr -----  
 ppcA-fpu AACT-----TAATAAAATAAATTATTTGACTGAATCATAATTTTCATCAAACCGTAAA-AATATAAGTGTAATTTCTATAAAAAGTAAAACAAATTCAAACTTGTATTTCGCATTAAACCACTATTATTTTACTG--  
 ppcA-Fc TCTGAAACTATTAGACTGTTAGCGTAATAAAATAAATTATTTGACTGAATTATAATTTCCGTTAAACCGTAGAGACTACAAGTGTAATTTACTCTAAAAGTAAATTAATTCAAACTTGTATTTCGAATTAAACTGCTACTATTTTACTG--  
 ppcA-Fp -----  
 ppcB-ft AAAAAAAGGGGAAATCAGTAGATTAA-----AGTTATTATAGGCTTTCTTTATTCATAAATTAATCAATGTCTTCTAAGAAGGAAGCAACGAAGGAACATTAAGACCATG  
 ppcB-fp TGATGTGGTGGTGTTA---TTGATTGT-----GTTTAGTAGACGATTGCCTAATTGATCATGC-----

ppcA-ft -----  
 ppcA-fb -----  
 ppcA-fbr -----  
 ppcA-fpu -----TTATGGCTAATATTTAATAAGTTTAAAGTGCCTTTTCAAAATTAAC  
 ppcA-Fc -----CTATTAATAATATTTAATAATTTAAA-GTGTGTTTCAAAAGTAAC  
 ppcA-Fp -----  
 ppcB-ft TTAGGTGCATTGAGATCTGTTTTACATGTTTTAGATTTGTACGACCCCTCGGAATCATGTGACATGTTAAGACCTTATCTAATTGGCAAACGATATTAATTTTACTATTTAAAATAATTAATAATGTAATATTTATAGTGCAAATTTAAT  
 ppcB-fp -----

ppcA-ft -----  
 ppcA-fb -----  
 ppcA-fbr -----  
 ppcA-fpu TATA-----  
 ppcA-Fc TATA-----  
 ppcA-Fp -----  
 ppcB-ft ATATTGCTTTTCATAATGTAATAAGAAAATAAAACAAGAAATATTTTCTGCCAAAGTAAAGCTACCATTTATTTATTAGTTGAATACGCTAGAGTATTTTTGTTTTTGGAGTCAAATTTGCAACTACGATGAAAACATAATGCATACT  
 ppcB-fp -----

ppcA-ft -----  
 ppcA-fb -----  
 ppcA-fbr -----  
 ppcA-fpu -----  
 ppcA-Fc -----  
 ppcA-Fp -----  
 ppcB-ft ACATTACATTTTTAAGGCTTATACATATTACTGAGTTTGATAATAAAAAATGTAGTTATAAAAAAATTTATAAAAAAACTTATAAAACGAATCCTCTTATATAGTTTTATCAAGACATGAGTTTACATATGAACACATAGGTTATTCCT  
 ppcB-fp -----AATAATGAATGCCTTACAAAGATATGACATCTAGAAAACATGTACATGCGTGTGTTGAGAAGCTAGCTAC-----

ppcA-ft -----  
 ppcA-fb -----  
 ppcA-fbr -----TGGGC  
 ppcA-fpu -----  
 ppcA-Fc -----  
 ppcA-Fp -----  
 ppcB-ft AGAGCGGTCCTATTTTACATAATACAATGAATATAACCCATCAAGCGTTGGAAG-----  
 ppcB-fp -----TATAACCCCTCAAGATGTATAAGTTTTATTAGGTTTGTGCTTTGAAGGCCATGTAATAGATATTGATTTTTAAGATGATACTCGATTATTTGGAAAGTAGGTGTCACGATATGGTGGGC

ppcA-ft -----  
 ppcA-fb -----  
 ppcA-fbr -----  
 ppcA-fpu -----  
 ppcA-Fc -----  
 ppcA-Fp -----  
 ppcB-ft -----  
 ppcB-fp CATATACATACACTTAGTTAATTTAAGGGAAATGAAAGTTAGAGTTTTAGAAATAATGCATATACTATTTCCCTACTGATCAACCGCTTTGAATGTATTTGACGAGCTGGTTAGAAGCCTAGAATGCACATAATGTGTCTACCTTGTGTCA

ppcA-ft -----  
 ppcA-fb -----  
 ppcA-fbr -----  
 ppcA-fpu -----  
 ppcA-Fc -----  
 ppcA-Fp -----  
 ppcB-ft -----ATGTGATAAAAAGATTTTGGGATTTTATCATCTCATATTATATCCCAGACGACGTCATATCTTATTAGTTAGTACAATAAGTCATGATTTG  
 ppcB-fp ATATTCATCGGTTTTGAGTCTACTTTATCTTCAAATCATTTAGGAGGTTTTATCACAATGCAAAAATCTTAGTTGGAGAAGTGGTATTATGGCATGCCTTATAGACACTTATGCAAAGAAACATCCGGTGAGGCCATAAAGACTGCATGG

ppcA-ft -----  
ppcA-fb -----  
ppcA-fbr -----  
ppcA-fpu -----  
ppcA-Fc -----  
ppcA-Fp -----  
ppcB-ft -----GTGGCTCTAACACTTTTGATTTTTTAAATCATACTATGCATGGTGTGTTACAAACCACATATAACATGATCTATAATATCTTTATTAATTTAGTTGTAA  
ppcB-fp CTATATATTGTGTTGCAATAACGGGTTTGGGAAATGTTATCATGTGTGGCTTAACTTTTGATTTTTCAAATCATACTATGCATGGTATGTTAAACCTACATATAACCGTCTATAAGATTTTTATTAATTTAGTTGTAA

ppcA-ft -----  
ppcA-fb -----  
ppcA-fbr -----  
ppcA-fpu -----  
ppcA-Fc -----  
ppcA-Fp -----  
ppcB-ft TTTACTCTGAAGATGAAAGACAACCTACCTACATGTGTAGTTTATGATTTTACATTTTTAAATTTGGTATGTGAGGCTACTAATGGTTTAAACCTGACTTTTTGTAAATTTAGGTTTTGGCGTTTTAAATTTGATTGGGCATT  
ppcB-fp TTTACTTTGAAGGTGGAAGCACCTTACCCTACATGTGTAGGTTTATGGTTTTTCCTTTTTAGTTTGGTATGTGAGACCCTAATGGTTTAAAAGTCAACTTTGTGTT-AAATTTAGGTTTTTGGCGTTTTGATTTGTTTGTGCATT

ppcA-ft -----GCTTATGTTTGTGGTAG-----TTTTCTTTTTGCATTTGATATGATA-----  
ppcA-fb -----  
ppcA-fbr -----  
ppcA-fpu -----TGCTTATGTTTGTGATAG-----TTTTCTTTTT-GTATTTGTTACTAT-----  
ppcA-Fc -----TGCTTATGTTTGTGATAT-----TTTTCTTTTTGTATTTGTTATTTGT-----  
ppcA-Fp -----TTCTTTTTGTATTTGTTATTTGT-----  
ppcB-ft TGATATGCTAGTCTTTGTTATGCTTAGGTTATAGAGTATGGTAATATGTTTGGATGTGTTTCATATGGACTTTTGTTTTTAAATTTGGGTTAATGTATTTGATATTTGATTTCATGT-----TTTTTTCATTTATTTGGAA-----GGG  
ppcB-fp CGATATGCTAGTCTTTGTTATGCTAAGGTTATAGAGTATGGTAATATGTTTTCATATGCTCATGTGGACTTTTGTTTTTTGTAGGGTTAATGTATTTTTTATTCGTATTCATGAATTTATTTATTTATTTATTTGGGTAGCGGAGGGG

ppcA-ft -----TCTAG-----  
ppcA-fb -----  
ppcA-fbr -----  
ppcA-fpu -----TTTGCTTA-----GTTTTCTTTTTGTATTTGTTACTATTTTGTCTAG-----  
ppcA-Fc -----TTAC-----GTCTAG-----  
ppcA-Fp -----TTAC-----GTCTAG-----  
ppcB-ft GAGGGTAGGTTTGAAGATGTTCAAGTGAATTTGTTTTA-----TTTTATTTTTCAATGTACTAATAGTTAATATTTAAAAATGCCGTTCTAAAAAAGTTATTTATTTAAAAATCAACATGATAAAACCATTTCTTATACCAT  
ppcB-fp GGGGGGGGGGTTGAAGATGTCCAAGAGCGTGTTCATGTGATTTTTTTATTTTTCTTTTTTGGCATGTACTAGTAGTTATTTATTTAAAAACG-----ACATGAAAAAACATTTGTTTATACCAT

ppcA-ft -----AACATGAAAAAGGACTCACCAGGACAGGAGTATTCATCTATGTTTT  
ppcA-fb -----  
ppcA-fbr -----  
ppcA-fpu -----AACATGAAAA--GACACACCAGGACACGA-----GCATCTGAGTTTT  
ppcA-Fc -----AACATGAAAA--GACACACCAGGACACAA-----GCATCTGAGTTTT  
ppcA-Fp -----AACATGAAAA--GACACACCAGGACACAA-----GCATCTGAGTTTT  
ppcB-ft TTATCCTTCAAATATCAATCAATCAAACTTTAAGCACAAAAACAAGAAAAACACATTATCCTTCAAAGATCAACCAATCAAACTTTAAGCACAAAAAGCAACATGAAAA--GTCATACAAATATACAAAGAGGTGTAAGAATT  
ppcB-fp ATATCCTTCAAAGATCAATCAATCAAACTTTAAGCACAAAAACA-----TGAAAA--GTCATCTAATATATAAAGAAGGTATAAGAATT

ppcA-ft TTATTCGAATATTTCTCGTTACACAATAGAAAAACAAAACAAATCCACGGAAAGGATAATGAGCTTATACGTGGACAATATGAGACTATATTTCTATGGTTGAAATCATGTGAA-----TTTATG-----  
ppcA-fb -----ATCATCTGAA-----TTTATG-----  
ppcA-fbr -----AAACGATA-----ATGTGGACCATATTTGAGACTATATTTTTGTGGTTGAAATCATATGAA-----TTTATG-----  
ppcA-fpu TTATTCGAATATTTCTCTTTACTCAGTAGAGAAGTAAAAACAAATCCATGAAAACGATA-----ATGTGGACCATATTTGAGACTATATTTTTGTGGTAGAAATCATATGAA-----TTTATG-----  
ppcA-Fc TTATTCGAATATTTCTCTTTACTCAATAGAAAAGTAAAAACAAATCCATGAAAAGGATAAATTAACCTTATATGTGGACCATATTTGAGACTATATTTTTGTGGTTGAAATCATATGAA-----TTTATG-----  
ppcA-Fp TTATTCGAATATTTCTCTTTACTCAATAGAAAAGTAAAAACAAATCCATGAAAAGGATAAATTAACCTTATATGTGGACCATATTTGAGACTATATTTTTGTGGTTGAAATCATATGAA-----TTTATG-----  
ppcB-ft GA-TTCTTATGCCAGAATCTTTTATCATCTAAAGCCAAGATAACAACCTTGC'TTAAATTTTAGGACCATCTTC-----TTAGACTATATTTGTGTAGGGAAAAATAATGAAGAAATAAAAAAACTTTTATGTGTGAAGAAATTT  
ppcB-fp GATTTCTTATGCCAGAATCTTTTATCATCTAAAGCCAATAACAATTTGCTTGAA'TTTTAGGACCATCTTC-----TTAGACTAAATTTGTGTAGGGAAAAATAATGAAGAAATAAAAAAACTTTTATGTGTGAAGAAATTT

ppcA-ft -----\* \* \*\*\*\* \* \* \*  
ppcA-fb -----AAAAATTAATTTGAAAGAGGAAAT  
ppcA-fbr -----AAAACTCAGTGAATAATTTGAATTAGAAAGAGGAAAT  
ppcA-fpu -----AAAACTC-GTGAATAATTTGAATTAGAAAGAGGAAAT  
ppcA-Fc -----AAAACTC-GTGAAGAGATTGAATTTGAAAGAGGAAAT  
ppcA-Fp -----AAAACTC-GTGAAGAGATTGAATTTGAAAGAGGAAAT  
ppcB-ft TTTAAAAATCTACCCCTAAAAATACATCAATTTCCAAATTTACCTTATATCAT-ATTTAAACACTGATCTTCTTTAAAAGTTTTTT-----AACCCAGTTAACACATCTAAT--AACTC-ATTAACAAATTTGAATTTGAAAGAGGAAAT  
ppcB-fp TTAGAACT-TCTACCCCTAAAAATACATCAATTTTAAATTTACCTTATATTTAGGATTTAAACACTGATTTTTTCAAAGAGGTTTTAAGTTATCAACAGAGTTAACTCATCTAAAAAACTC-ATCAAGAAATTTGAGTTGAAAGAGGAAAT



ppcA-ft  
ppcA-fb  
ppcA-fbr  
ppcA-fpu  
ppcA-Fc  
ppcA-Fp  
ppcB-ft  
ppcB-fp

ATAATCATTTTATCTATATGTTTAAAAGCATCACTTTTAGTTTAAAAGTTTCATATCTATA-CTAAACTTAAAACCACTAATTTAACTTTTGAACCAACTTTGACACACCCGATAACACTTTTAAATGTAAATGGTATTTTAACTTT  
CTAACCATTTTCTCTACAAGTTTAAAAACATCACTTTTAGTCTAAATGTTTCATATTTTCTGACTAAAAATAAAACAACATAATAACTTTTGGACTAAATTTGAAACAACGTATAAAACTTTTAAACGTAAATTGATGTTTTAATTTT

ppcA-ft  
ppcA-fb  
ppcA-fbr  
ppcA-fpu  
ppcA-Fc  
ppcA-Fp  
ppcB-ft  
ppcB-fp

TTGAGTCAGAATAGTTATCTTCACCGAACTTTAGAGATTTAACCCAAATTAATTTCTAAAATCAAATAATGTGAAAACTTAATTTCCGGTGCTAGGGTTCTAATGACATTTCTAAAATAAGTTTACTTAATAAAAGGTTGGTTACTAAAAA  
TTAAATCAAATAGTTTTTTTTT-CGAACTTTGGGGATTCAACCAAATTTAATTTCTAAAATCAAATATGTGAAAACTTAATTTCTAGTGGTAGGGTTTTGATGACCTTCTAAAATAGTT-----

ppcA-ft  
ppcA-fb  
ppcA-fbr  
ppcA-fpu  
ppcA-Fc  
ppcA-Fp  
ppcB-ft  
ppcB-fp

-----TATATATATATATATGTATA  
AAAGTATAATTTTCGTGTGAAAAGTACGAAGTTATCAGGGCGCAACATGACAGAGAAGTAAATTCGTCCACACCACAATTACGCATATAAGGTACGTAATCAGCAAGTTATATTCATAGGTACGCAAATTTATATTTTTATTATGCAA

ppcA-ft  
ppcA-fb  
ppcA-fbr  
ppcA-fpu  
ppcA-Fc  
ppcA-Fp  
ppcB-ft  
ppcB-fp

TATATATATACACACACACACACATATATAT-----ATATATATATATATATGTATGTATGTATATATG  
GTAAAATTTACTCAGTTATAAAAATTTAATTACGCAAATTTGTTCATAATTATGCAGTTAATGATAACGTAAGTTATACGCACAACAATAGACGTTTTTAAAAAATGATGATTTAAATATATATATATGTGTGTGTGTGTATATATA

ppcA-ft  
ppcA-fb  
ppcA-fbr  
ppcA-fpu  
ppcA-Fc  
ppcA-Fp  
ppcB-ft  
ppcB-fp

TATATATATATGTGTGTGTG--TGTGTGAATATGTTGCATATATATGAGAAATGGAAATTAAGTACAATAATATTTCTC-----  
-----TGTGTGTGGGAATAA--TTGCATATATATTTGAGAAATGGAAAATAAGTACAAT-----  
-----TGTATGTGTGAATAT--ATGCATATATATTTGAGAAATGGAAATTAAGTACAATAAAGAACTTTGCGTTCGAGGGACTATAAAAATCTAATAAAAATACTAACGCCAAAATGTTATCATGAGTGCCTGTTGAGG  
-----TGTATGTGTGAATAT--ATGCATATATATTTGAGAAATGGAAATTAAGTACAATAAAGAACTTTGCGTTCGAGGGACTATAAAAATCTAATAAAAATACTAACGCCAAAATGTTATCATGAGCGCCATGTTGAGG  
-----TGTGTGTGTGTGAATAT--ATGCATATATATTTGAGAAATGGAAATTAAGTACAAC-----  
-----TGTG--TGTGTGAATAT--ATGCATATATATTTGAGAAATGGAAATTAAGAACAAA-----  
TATATATATAACAATACTTTACTTA-----TATAAAAATAGGATAAAAATGCTTGATTTACGATG-----

ppcA-ft  
ppcA-fb  
ppcA-fbr  
ppcA-fpu  
ppcA-Fc  
ppcA-Fp  
ppcB-ft  
ppcB-fp

ATAAGAAAAAAACAAAACCTGAACGTCGTT-----  
ATAAGAAAAAAACAAAACCTGAACGTTGTTTCAGTGACGAAGCTTGAGCCAAAGGTTAGGGGGGGTGGGGGCGAAAGTAAACTATTTTTGAGGGGACGTACTCTATATTTATTAATAAAAATTCCTACTATCGGACCGAAAATTTACACTATT

ppcA-ft  
ppcA-fb  
ppcA-fbr  
ppcA-fpu  
ppcA-Fc  
ppcA-Fp  
ppcB-ft  
ppcB-fp

-----CCAGTGACGAAAAAGAGGCCCCCGGGCCCAATGAGGCTTCGCCTTTGCCTCGTTTCATAATAATTTGA--AATGTATATAAAAAACCGTCGCAAACCGTGGTAGAGGCATGCCGCTATAGAAAAAATCAAACAG  
GAGTCGAAAATTTACACTACTGACGAAAAAAGAGCCCC-----CCCAATGAAGCTTCGCCTTTGCCTCGTTTCATAATAATTTGAAAAATGCATATAAAAAACCGTCGAGACCCGTTAGAGGCATGCCGCTACAGAAAAAATCAAACAG

ppcA-ft  
ppcA-fb  
ppcA-fbr TTAGGAACATTAATT-TAAAAATTATCACCTAAATCCTTGAATCTTATAGGACGTATAATTCATTTTGAACGAAATTTACTGAAATGTGAAAAAATAATAAGTGTTCATGACAATATGTTTGACATTCGTAAAAATGTAAGTTTT  
ppcA-fpu TTAGGAACATTAATTTAAAAATTAACACCTAAATCCTTGAATCTTATAGGACGTATATTTCCATTTTGAACGAAATTTACTGAAATGTGAAAAAACAATAAGTGTTCATGACAATATGTTTGAAATTTTCGTAAAAATGTAATTTTT  
ppcA-Fc  
ppcA-Fp  
ppcB-ft  
ppcB-fp

ppcA-ft  
ppcA-fb  
ppcA-fbr TATTATTTATAGGAGTAAAAACAAAAATATTTTGAATGTGTAATAATTACAAATGCATCGATATATGGTATAGAGCGTAAAGTTAACTAAACTTGGGGAAGAAAAATGAAACATTTTAGGGTTTTTAATGTAAACTAGGTTTTGGCCCG-CGCG  
ppcA-fpu TATTATTTATAGGAGTAAAAACAAAAATATCTTGAATGTGTAATAATACAAATGCATCTATATATGGTATAGATCGTAAAGTTAACTAAACTTGGGGAAGAAAAATGAAACATTTTAGGGTTTTTAATGTAAACTAGGTTTTGGCCCGCGCG  
ppcA-Fc  
ppcA-Fp  
ppcB-ft  
ppcB-fp

ppcA-ft  
ppcA-fb  
ppcA-fbr TTGCCGCGGATATGCGAGTTTTAACGTAACCGTAAACCGAAATCAAATCAAATGAAGGTTTGAATCACAAAATCAGCAGAAAAATACACAAAAGTAAAAACACCAAAACCCCAATCCATAAAACACTAGAACATGTAGAACACAAAA  
ppcA-fpu TTGTCGCGGATATACGGGTTTTAACGTAACCCTAAACCAAAATCAAATCAAATGAAGGTTTGAACCACAAAATCAGC--AAAATACACAAAAGTAAAAACACCAAAACCCCAATCCATAACACACTAGAACACTT-GAACACAAAA  
ppcA-Fc  
ppcA-Fp  
ppcB-ft  
ppcB-fp

ppcA-ft  
ppcA-fb  
ppcA-fbr ACTAAATTAAGCCCAACACCATACATAAAACAAATGAAAAATCAAAGGCGCAAGAAGGCGCACAGTTCAAAATAGAAAACCAACGAATATCAAAGCCTCGAAAAGCGCAAAACAAAAGGAAAACCTAGACCTTAATAGTGAGAATCGTC  
ppcA-fpu AATAAATTAAGCCCAACATCATACATAAAACAAACGAAAAATCAAAGCAGCAAGAAGGCGCACAGTTCAAAATAGAAAACCAACGAATATCAAAGCCCGAAAAGCGCAAAAC-AAAAGGAAAACCCAAACCTTAATAGCGAGAATCGTC  
ppcA-Fc  
ppcA-Fp  
ppcB-ft  
ppcB-fp

ppcA-ft  
ppcA-fb  
ppcA-fbr AGTGTATCGATAGCGGAAGAAAGAAAGCAGGAACCCGAGAAAGACAACACCAACGAACCCATAAACGAACATAATCGAAACACACATCAAAGGCACGTGTCAGACACCAAAACCCACC-AAAAAACCCACCCCAACCTCGAACCC  
ppcA-fpu AGTGTATCGATAGCGGAAGAAAGAAAGCAGGAACCCGAGAAAGACAACACCAACGAACCCATAAACGAACATAATCGAAACACACATCAAAGGCACGTGTCAGACACCAAAACCTCACCAAAAAACCCACCCCAACCTGAAACCC  
ppcA-Fc  
ppcA-Fp  
ppcB-ft  
ppcB-fp

ppcA-ft  
ppcA-fb  
ppcA-fbr AACACCCAAAACAAATCCTATAAAACACACA----AAAAACAATATTAATAGGAATAGATAAATTAATAAAAAAGAAAAATAAAATTCATGCATTGCAACTTGTGATTGTGCAAGATGACTTTACATTTATGTCACTTGTAGATAAT  
ppcA-fpu AACACCCAAAACAAATCCTATAAAACACACACAAAAAAAACAATATTAATAGGAATATATAAATTAATAAAAAAGAAAAATAAAATTCAGGCATTGCAACTTGTAGATTGTGCATGATGACTTTACATTTATGTCACTTGTAGATAAT  
ppcA-Fc  
ppcA-Fp  
ppcB-ft  
ppcB-fp

ppcA-ft  
ppcA-fb  
ppcA-fbr AATAAGCTAGCTTTACCCGGCGCGCTTTGTGACGGCATCATAACGACGTAATAGAGTATAGATTATAATCGACCTTAATCGTTCCAACTAAATTTACGTGAAACATAGAGAACTTAAATGATACCTTTTAATACATGACTCTTCT  
ppcA-fpu AATAAGCTAGCTTTACCCGGCGCGCTTTGCGGTGGCATCATAACGTCGTAATAGAGTATACACTATAATCGACCTTAATCGTTTCCAACTAAATTTATGTGAAACATAGAGAACTTAAATGATATCTTTTAATACATCACTTTTCT  
ppcA-Fc  
ppcA-Fp  
ppcB-ft  
ppcB-fp

ppcA-ft  
ppcA-fb  
ppcA-fbr CAAAACACATTTATGTCAAATGTTGAGCAAACCAAACATACATAAAAAAGCACACACGGCGGTGCCGTATGCGATATGATAAAGTACATGTTACAAAAGCACCTGACTCGTTTTTCGAACTAAATTTATGCTAAAACGTATTTATACCG  
ppcA-fpu CAAAACACATTTATGTCAAATGTAGAGCAACCCAAAACATACATAAAAAAACATGCGGTGGTGTGCGTATGCGATATGATAAAGTACATATTACAAAAGCACCTGACTCGTTTTTCGAACTAAATTTACGCCAAAACGTATTTATACCG  
ppcA-Fc  
ppcA-Fp  
ppcB-ft  
ppcB-fp

ppcA-ft  
ppcA-fb  
ppcA-fbr TTAAATGAAATGTATTATATTTGACCCAATTTTCAAACATAAATTAAGTCGAAACATATACACCGTCGAATGAAACGTATTATATTTTACCGCGGCATAAAATTTACGTCGAGACATATTTATACCGTCAAATGGACGTATTATATTTGA  
ppcA-fpu TTAAATGAAATGTATTATATTTGACCCAATTTTCAAACATAAATTAAGTCGAAACATATATACCGTCGAATGAAACGTATTATATTTTACCGCGGCATAAAATTTACATCGAGACATATTTATACCGTCAAATGGACGTATTATATTTGA  
ppcA-Fc  
ppcA-Fp  
ppcB-ft  
ppcB-fp

ppcA-ft  
ppcA-fb  
ppcA-fbr ATCGACCCATTCCTCCACACAAGTAAAAGATTCTTCAACCAATAAAACAAATACAATAAAAGATAAAAAATAATGTTTATTTAGTTTCTAAATAAATATAGAAATTTAAAAGACTTAGTGGCCAAAGTTGAAGAAACCATAGAATAGGGC  
ppcA-fpu ATCGACTCATTTGCTCCACACAACATAAAGATTCTTCAACCAATAAAACAAATACAATAAAAGATAAAAAATAAATAGTTGTTTTTTAGTTTCTAAATAAATAAATAAATTTAAAAGACTTAGTGGCCAAAGTTGAAGAAACCATAGAATAGGGC  
ppcA-Fc  
ppcA-Fp  
ppcB-ft  
ppcB-fp

ppcA-ft  
ppcA-fb  
ppcA-fbr TAAAAGAAAAATATTA AAAAGTGTGTGGCCAAAATTAAGGATACCATAGAATAGGGCTAAAACATATAAATTA AAAAGTTTTGTGGCTAAAATGAAAGAAACCAAACCTCTCAATTCATTCCATTGGGTTTATTAATATTATGCAA  
ppcA-fpu TAAAACAAAAATATTA AAAAGTGTGTGGCCAAAATTAAGGATACCATAGAATAGGGCTAAAACATATAAATTA AAAAGTTTTGTGGCTAAAATGAAAGAAACCAAACCTCTCAATTCATTCCATTAGGTTTATTAATATTATGCAA  
ppcA-Fc  
ppcA-Fp  
ppcB-ft  
ppcB-fp

ppcA-ft  
ppcA-fb  
ppcA-fbr -----TACATAGAGGCGTTAATGCGTCAATTTTGTGTGTTAAAGACATAATCTAATACAACATTGAAGATTTTCTATGAATTTGGAAAGTATGTA TACA-----  
ppcA-fpu -----GCTATTCTCTGTACATAAAGGCGTTAACGGATCAATTTTGTGTGTTAAAGACCAATCTGATACAACATTGAAGATTTTCTATGAATTTGGAAAGTATGCA TACACAAAAAATTTAAGACCAAATCTGATACAACATTG  
ppcA-Fc -----GCTATTCTCTGTACATAGAGGTTAACGGGTCAAATTTGCGTGTAAAGATCAAATCTGATACGACCTTGAAGATTTTCTATGAATTTGGAAAGTATGCA TATA-----  
ppcA-Fp -----GGTATTCTCTGTACATAGAGGTTAACGGGTCAAATTTGCGTGTAAAGACCAATCTGATACGACCTTGAAGATTTTCTATGAATTTGGAAAGTATGCA TACA-----  
ppcB-ft -----GGTATTCTCTGTACATAGAGGCGTTAACGGGTCAAATTTGCGTGTAAAGACCAATCTGATACGACCTTGAAGATTTTCTATGAATTTGGAAAGTATGCA TACA-----  
ppcB-fp -----GGTATTCTCTGTACATAGAGGCGTTAACGGGTCAAATTTGCGTGTAAAGACCAATCTGATACGACCTTGAAGATTTTCTATGAATTTGGAAAGTATGCA TACA-----

ppcA-ft  
ppcA-fb  
ppcA-fbr -----CAAAAATATGTAAGAGA-----TAAA--GACTTGTGTG-----GAAATCAAATACCTATAAAAATAATTGCAATGTTTACGAAAGATGATTTGTTTAT  
ppcA-fpu AAGATTTTTTATGAATTTGGAAAGTATGCATACAAAAATTTATATAAGAGATGTAAGTGAAGA-----TTTTTTGTCCACCAAGAAATCAAATACCTATAAAAATAATTGCACCTGTTACGAAAGATAATTTGTTTAT  
ppcA-Fc -----CAAAAATATGTAAGAGA-----TGAAAATGACTTGTGTGTTGATTTTTTTATCACCAGAAATCAAATACCTGTAAAATAATTGCACGTTTACGGAAGATGATTTGTTTAT  
ppcA-Fp -----AAAATATGTAAGAGAGGTGAACCTGAAAATGACTTGTGTGTTGATTTTTTTGTCCACCAAGAAATCAAATATCTATAAAAATAATTGCACCTGTAATGTAAGATGGTACGTTTAT  
ppcB-ft -----GAAAATATGTAAGAGACGTGAACCTGAAAATGACTTGTGTGTTGATTTTTTTGTCCACCAAGAAATCAAATATATAAAAATAATTGCACCTGTA-----GATAGTTGTTTAT  
ppcB-fp -----GAAAATATGTAAGAGACGTGAACCTGAAAATGACTTGTGTGTTGATTTTTTTGTCCACCAAGAAATCAAATATATAAAAATAATTGCACCTGTA-----GATAGTTGTTTAT

ppcA-ft  
ppcA-fb  
ppcA-fbr TTATGTATTAACTTTTTACATAAAAATACCTACTAAGTTTGATTTTTAAAATAAAAATTAACCTTAAAATTTAG-CAGAATAACCAGGTAAACTCATAAACACATGGTACTGACTTTTACTCACCCTA- TTAGCTAAGTGTGTTTGTGATAC  
ppcA-fpu TTATATATTAACGTTTTTACATAAAAATACCTAGTAAGTTTGATTTTTAAAATAAAAATTAACCTTAAAATTTAT-CCAGAATAACCAGGTGAACCTCAGAAACACATCATACTGACTTTTACTCAACAATTTAGGTAAGTGTGTTTGTGATAC  
ppcA-Fc TCATGTTTAAACTTTTTACATAAAAATACCTAATAAGTTTGATAAATTAAGTAAAATAAATTAACCTTAAAATTTAACTAGATAAACCAGGTGAACCTCATGAACATATAGTATTGATTTTACTCACCCTA- TTAACTAAGTGTGTTTGTGATAC  
ppcA-Fp TCATGTTTAAACTTTTTACATAAAAATACCTAATAAGTTTGATTTTTAAAAGTAAAATAAATTAACCTTAAAATTTAACTAGATAAACCAGGTGAACCTCATGCCCACATCGTACTGATTTTACTCACCCTA- TTAACTAAGTGTGTTTGTGATAC  
ppcB-ft TTATGTTTAACTTTTTTACATAAAAATACCTAATAAGTTTAAAGATTTAAAATAAAAATAAATTAACCTTAAAATTTAACTAGATAAACCAGGTGAACCTCATGAACACATCATACTAACTCTACTTACCCTA- TTAACTAAGTGTGTTTGTGATTC  
ppcB-fp TTATGTTTAACTTTTTTACATAAAAATACCTAATAAGTTTGATTTTTAAAATAAAAATAAATTAACCTTAAAATTTAACTAGATAAACCAGGTGAACCTCATGAACACATCATACTAACTCTACTTACCCTA- TTAACTAAGTGTGTTTGTGATTC







```

ppcA-ft  GTATTTCTTAATAAAAATTATGTTGGGTTTACAGTATCTATTGGGTGGATTCTTAAACGGATTG-----TGGTTTGATTAATAA-----
ppcA-fb  GTATTTCTTAATAAAAATTCTATTGGGTTTACAGTATCTATTGGGTGGATTCTTATACGGATTG-----TGGTTTCATTAATAA-----
ppcA-fbr GTATTTGCTT-----AAATTCTGTTGGGTTTACAGTATCAAATGGGATGGATTCTTATACGGTTTG-----TGGTTTGATTAATGA-----
ppcA-fpu GTATTTGCTT-----AATTTCTGTTGGGTTTACAGTATCAAATGGGATGGATTCTTATACGGTTTG-----TGGTTTGATTAATGA-----
ppcA-Fc  CTATTTGCTT-----AATTTATGTTGGGTTTACAGTATCTATTGGGATGGATTCT-----TGTACCGT-----TATATGGTTTGTGGTTC--GATTA-----
ppcA-Fp  CTATTTGCTT-----AATTTATGTTGGGTTTACAGTATCTATTGGGATGGATTCT-----TGTACCGT-----TATATGGTTTGTGGTTC--GATTA-----
ppcB-ft  AATTTGTTGTTA-----AATCTCTGTTGGGTTTACAGTATTTGTTGGATTGATGATCGGCTGCTTCACGTGAACGTCAAAATCAAAAATGTTTGGATTGTTGGATTGATGATCGGCTGCTTCACGTGAACGTCAAAATCATAAATGTTTGG
ppcB-fp  AATTTGTTGTT-----AATTTCTGTTGGGTTTACAGTATTTGTTGGATTGATGATCGGCTGCTTCACGTGAACGT-----TAAATGTTTGGATTGAGGGATTA-----
* * * * *      *** * * ***** **      * * * * *      * * * * *      * * * * *
ppcA-ft  -----AAATCTTAATGAGAAGTTTGTGATA-----ATATGCTGAAATG-----GGTTGTTTTGTGTTAATTTTTCAGGGTTGGAGGGGAATTAAGTATTAAGCAAGGGTGTGAGTAATG
ppcA-fb  -----ATAATCTTAATCAGAAGTTTGTGATA-----ATATGCTAAAATA-----GGTTGTTTTATGTTAATTTTTCAGGGTTGGAGGGGAATTAAGTATTAAGCAAGGGTGTGAGTAATG
ppcA-fbr -----AT-----CTCGACGAGAAGTTTGTGATA-----ATATGCTGAAATG-----GGTTGTTTTGTGTTGATTTTTCAGGGTTGGAGGGGAATTAAG-----CAAGGGTGTGAGTAATG
ppcA-fpu -----AT-----CTCGACGAGAAGTTTGTGATA-----ATATGCTGAAATG-----GGTTGTTTTGTGTTGATTTTTCAGGGTTGGAGGGGAATTAAG-----CAAGGGTGTGAGTAATG
ppcA-Fc  -----TGGCTCTCGATCAGAAGTTTGTGATA-----ATCTGCTGAAATG-----GGTTGTTTTGTGTTAATTTTTCAGGGTTGGAGGGGAATTAAG-----CAAGGGTGTGAGTAATG
ppcA-Fp  -----TGGGCTCTCGATCAGAAGTTTGTGATA-----ATCTGCTGAAATG-----GGTTGTTTTGTGTTAATTTTTCAGGGTTGGAGGGGAATTAAG-----CAAGTGTGTGTAATG
ppcB-ft  AATTTGTTGGATTGTTGGGTTTGGATCAGAAGTTTGTGATGCTGTCATGATCCGCTATAAATGGGTTGT-----TTTTATTTTGGATTTTTCAGGATTGGGGGA-ATTTGAA-----CACTGATTTGTGTAATG
ppcB-fp  -----TGGGTTTTGATCAAAAACTTTGTGATCTTGTCAATGATCCGCTATAAATGGGTTGT-----TTTTATTTTGGATTTTTCAGGATTGGAGGA-ATTTGAA-----CACTGATTTGTGTAATG
* * * * *      * * * * *      * * * * *      * * * * *      * * * * *      * * * * *

```

**Supplemental Fig. 1** Nucleotide sequence alignment of the 5'-upstream regions of the *ppcA* genes of *F. trinervia*, *F. bidentis*, *F. brownii*, *F. pubescens*, *F. cronquistii* and *F. pringlei* and the *ppcB* genes of *F. trinervia* and *F. pringlei*. The *ppcB* promoters of *F. trinervia* and *F. pringlei* are quite similar, they share about 66% identical nucleotides and contain a MEM1-like sequence. Identical positions in all *ppc* genes are marked by an asterisk. The start site of the *F. trinervia ppc* transcript is indicated by the red thymidine nucleotide, the position of the distal and proximal promoter region by the yellow boxes and the position of the intron in the 5' untranslated leader of the *ppc* genes by grey nucleotides. The MEM1 region is indicated by the grey box, the first nucleotide at the 5' region in MEM1 and the CACT tetranucleotide are indicated by red boxes.
